# Supplementary material for: Does Insulin Glargine Increase the Risk of Cancer Compared With Other Basal Insulins? A French nationwide cohort study based on national administrative databases
Source: PubMed Central journal article supplement — Diabetes Care. 2013 Jan 17;36(2):294–301. doi: 10.2337/dc12-0506 (PMC3554310; doi:10.2337/dc12-0506), 2013-01-17
Supplement: supp_dc12-0506v120506_DC120506SupplementaryData.pdf [file supp_dc12-0506v120506_DC120506SupplementaryData.pdf]

SUPPLEMENTARY DATA

**Supplementary Table 1.** Risk of all malignancies and breast cancer for insulin glargine versus other basal insulins, stratified by ever metformin use: adjusted HR estimated from the three multivariate Cox models with age as the time-scale (Source SNIIRAM-PMSI, January 2006 - December 2010)

|                                   | Model 1 <sup>a</sup> |             | Model 2 <sup>b</sup> |             | Model 3 <sup>c</sup> |             |
|-----------------------------------|----------------------|-------------|----------------------|-------------|----------------------|-------------|
|                                   | HR                   | 95% CI      | HR                   | 95% CI      | HR                   | 95% CI      |
| <b>Never exposed to metformin</b> |                      |             |                      |             |                      |             |
| All malignancies                  | 0.99                 | (0.85–1.15) | 1.00                 | (0.86–1.17) | 1.11                 | (0.93–1.32) |
| Breast cancer                     | 1.08                 | (0.58–2.03) | 1.06                 | (0.56–1.99) | 1.49                 | (0.69–3.23) |
| <b>Exposed to metformin</b>       |                      |             |                      |             |                      |             |
| All malignancies                  | 0.95                 | (0.83–1.09) | 0.95                 | (0.83–1.09) | 0.99                 | (0.85–1.15) |
| Breast cancer                     | 0.97                 | (0.62–1.50) | 0.98                 | (0.63–1.52) | 0.94                 | (0.58–1.52) |

<sup>a</sup> Adjusted for gender (all malignancies)

<sup>b</sup> Adjusted for gender (all malignancies) and OHA class use

<sup>c</sup> Adjusted for gender (all malignancies), OHA class use and duration of diabetes

**Supplementary Table 2.** Risk of all malignancies, breast cancer, and seven other sites for insulin glargine versus other basal insulins: adjusted HR estimated from the three multivariate Cox models with length of follow-up as the time-scale (Source SNIIRAM-PMSI, January 2006 - December 2010)

|                  | Model 1 <sup>a</sup> |             | Model 2 <sup>b</sup> |             | Model 3 <sup>c</sup> |             |
|------------------|----------------------|-------------|----------------------|-------------|----------------------|-------------|
|                  | HR                   | 95% CI      | HR                   | 95% CI      | HR                   | 95% CI      |
| All malignancies | 0.97                 | (0.88–1.08) | 0.98                 | (0.88–1.08) | 1.04                 | (0.93–1.16) |
| Breast cancer    | 1.00                 | (0.70–1.44) | 1.00                 | (0.69–1.43) | 1.07                 | (0.71–1.61) |
| Prostate         | 0.92                 | (0.65–1.30) | 0.90                 | (0.64–1.28) | 1.01                 | (0.69–1.48) |
| Colorectal       | 0.94                 | (0.70–1.25) | 0.94                 | (0.71–1.26) | 0.98                 | (0.72–1.33) |
| Liver            | 0.98                 | (0.69–1.38) | 0.98                 | (0.69–1.38) | 1.07                 | (0.72–1.59) |
| Kidney           | 0.99                 | (0.51–1.92) | 1.00                 | (0.52–1.94) | 1.09                 | (0.54–2.23) |
| Bladder          | 1.13                 | (0.74–1.71) | 1.14                 | (0.75–1.72) | 1.05                 | (0.67–1.65) |
| Lung             | 1.04                 | (0.76–1.42) | 1.04                 | (0.76–1.42) | 1.11                 | (0.78–1.57) |
| Head and neck    | 0.83                 | (0.47–1.46) | 0.84                 | (0.47–1.47) | 0.92                 | (0.48–1.74) |

<sup>a</sup> Adjusted for gender (all malignancies)

<sup>b</sup> Adjusted for gender (all malignancies) and OHA class use

<sup>c</sup> Adjusted for gender (all malignancies), OHA class use and duration of diabetes

SUPPLEMENTARY DATA

**Supplementary Table 3.** Risk of all malignancies, breast cancer, and seven other sites for glargine versus other basal insulins: adjusted HR estimated from the three multivariate Cox models with age as the time-scale and a 6-month period for the exclusion of cancers following inclusion and for the defined time lag for exposure to insulin glargine (Source SNIIRAM-PMSI, January 2006 - December 2010)

|                  | Model 1 <sup>a</sup> |             | Model 2 <sup>b</sup> |             | Model 3 <sup>c</sup> |             |
|------------------|----------------------|-------------|----------------------|-------------|----------------------|-------------|
|                  | HR                   | 95% CI      | HR                   | 95% CI      | HR                   | 95% CI      |
| All malignancies | 0.95                 | (0.87–1.04) | 0.96                 | (0.88–1.05) | 0.99                 | (0.90–1.09) |
| Breast cancer    | 1.00                 | (0.72–1.37) | 0.99                 | (0.72–1.37) | 1.06                 | (0.74–1.51) |
| Prostate         | 0.90                 | (0.67–1.20) | 0.89                 | (0.67–1.19) | 1.03                 | (0.74–1.43) |
| Colorectal       | 1.14                 | (0.87–1.47) | 1.14                 | (0.88–1.48) | 1.18                 | (0.89–1.56) |
| Liver            | 0.92                 | (0.69–1.22) | 0.94                 | (0.71–1.25) | 0.99                 | (0.72–1.36) |
| Kidney           | 0.91                 | (0.54–1.52) | 0.90                 | (0.54–1.50) | 0.89                 | (0.51–1.56) |
| Bladder          | 0.96                 | (0.68–1.35) | 0.97                 | (0.69–1.37) | 0.90                 | (0.62–1.31) |
| Lung             | 0.98                 | (0.75–1.27) | 0.98                 | (0.75–1.27) | 0.95                 | (0.71–1.27) |
| Head and neck    | 0.95                 | (0.58–1.54) | 0.97                 | (0.60–1.59) | 1.00                 | (0.58–1.74) |

<sup>a</sup> Adjusted for gender (all malignancies)

<sup>b</sup> Adjusted for gender (all malignancies) and OHA class use

<sup>c</sup> Adjusted for gender (all malignancies), OHA class use and duration of diabetes

SUPPLEMENTARY DATA

**Supplementary Figure 1.** Flow diagram of the study population

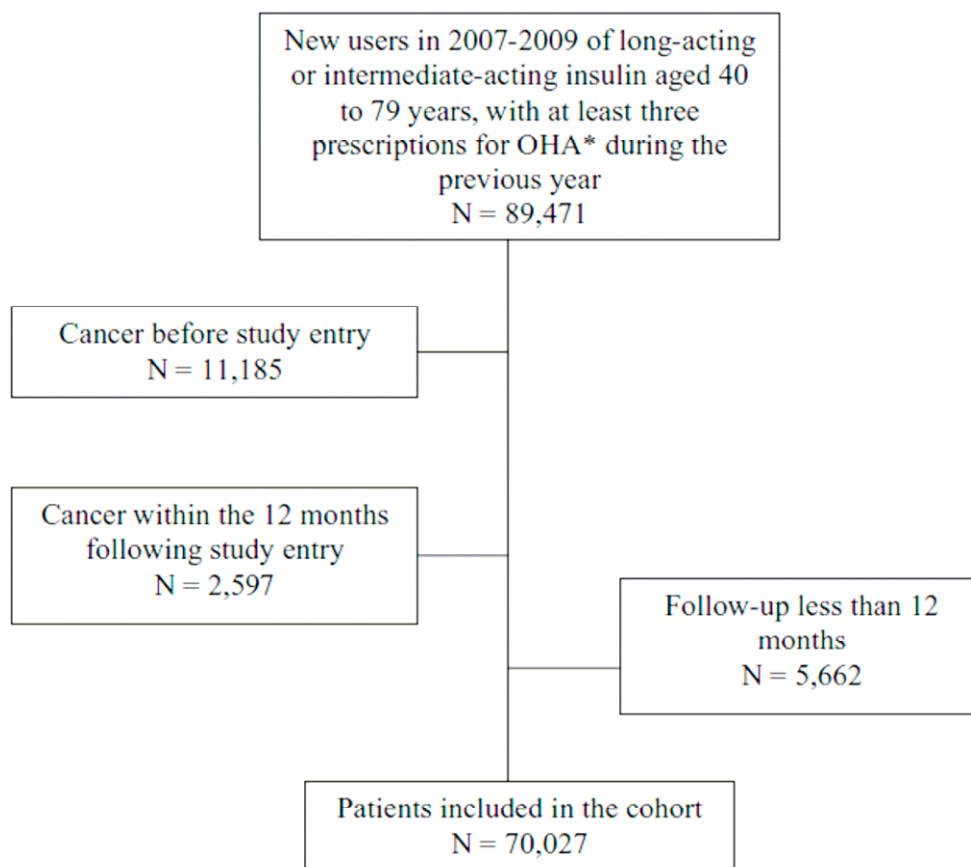

\* OHA: other hypoglycaemic agent
